# Supplementary material for: Dynamic interventions to control COVID-19 pandemic: a multivariate prediction modelling study comparing 16 worldwide countries
Source: Springer Nature journal article supplement (doi:10.1007/s10654-020-00649-w), 2020-05-01
Supplement: 10654_2020_649_MOESM2_ESM.pdf [file 10654_2020_649_MOESM2_ESM.pdf]

**Table S1: Estimates of the severity of cases for Australia**

| <b>Age group</b>                 | <b>N</b> | <b>Proportion of total population, %</b> | <b>Proportion of infected individuals hospitalised, %</b> | <b>Proportion of hospitalised cases requiring critical care, %</b> | <b>Proportion of individuals requiring critical care die, %</b> | <b>Infection fatality rate, %</b> |
|----------------------------------|----------|------------------------------------------|-----------------------------------------------------------|--------------------------------------------------------------------|-----------------------------------------------------------------|-----------------------------------|
| 0-9 years                        | 3280238  | 13.02                                    | 0.00                                                      | 0.00                                                               | 0.00                                                            | 0.00                              |
| 10-19 years                      | 3079378  | 12.22                                    | 0.04                                                      | 0.00                                                               | 0.00                                                            | 0.01                              |
| 20-29 years                      | 3401525  | 13.50                                    | 1.04                                                      | 5.00                                                               | 59.42                                                           | 0.03                              |
| 30-39 years                      | 3662343  | 14.53                                    | 3.43                                                      | 5.00                                                               | 49.21                                                           | 0.08                              |
| 40-49 years                      | 3282597  | 13.02                                    | 4.25                                                      | 6.30                                                               | 60.13                                                           | 0.16                              |
| 50-59 years                      | 3093653  | 12.27                                    | 8.16                                                      | 12.20                                                              | 59.77                                                           | 0.60                              |
| 60-69 years                      | 2605017  | 10.34                                    | 11.80                                                     | 27.40                                                              | 59.69                                                           | 1.93                              |
| 70-79 years                      | 1768659  | 7.02                                     | 16.60                                                     | 43.20                                                              | 59.68                                                           | 4.28                              |
| 80+ years                        | 1029790  | 4.09                                     | 18.40                                                     | 70.90                                                              | 59.79                                                           | 7.80                              |
| <b>Age-standardised rates, %</b> |          |                                          | <b>5.34</b>                                               | <b>29.23</b>                                                       | <b>59.57</b>                                                    | <b>0.93</b>                       |

**Table S2: Estimates of the severity of cases for Belgium**

| <b>Age group</b>                 | <b>N</b> | <b>Proportion of total population, %</b> | <b>Proportion of infected individuals hospitalised, %</b> | <b>Proportion of hospitalised cases requiring critical care, %</b> | <b>Proportion of individuals requiring critical care die, %</b> | <b>Infection fatality rate, %</b> |
|----------------------------------|----------|------------------------------------------|-----------------------------------------------------------|--------------------------------------------------------------------|-----------------------------------------------------------------|-----------------------------------|
| 0-9 years                        | 1305219  | 11.31                                    | 0.00                                                      | 0.00                                                               | 0.00                                                            | 0.00                              |
| 10-19 years                      | 1298970  | 11.26                                    | 0.04                                                      | 0.00                                                               | 0.00                                                            | 0.01                              |
| 20-29 years                      | 1395385  | 12.09                                    | 1.04                                                      | 5.00                                                               | 59.42                                                           | 0.03                              |
| 30-39 years                      | 1498535  | 12.99                                    | 3.43                                                      | 5.00                                                               | 49.21                                                           | 0.08                              |
| 40-49 years                      | 1524152  | 13.21                                    | 4.25                                                      | 6.30                                                               | 60.13                                                           | 0.16                              |
| 50-59 years                      | 1601891  | 13.88                                    | 8.16                                                      | 12.20                                                              | 59.77                                                           | 0.60                              |
| 60-69 years                      | 1347696  | 11.68                                    | 11.80                                                     | 27.40                                                              | 59.69                                                           | 1.93                              |
| 70-79 years                      | 908725   | 7.88                                     | 16.60                                                     | 43.20                                                              | 59.68                                                           | 4.28                              |
| 80+ years                        | 658753   | 5.71                                     | 18.40                                                     | 70.90                                                              | 59.79                                                           | 7.80                              |
| <b>Age-standardised rates, %</b> |          |                                          | <b>6.01</b>                                               | <b>31.46</b>                                                       | <b>59.62</b>                                                    | <b>1.13</b>                       |

**Table S3: Estimates of the severity of cases for Chile**

| <b>Age group</b>                 | <b>N</b> | <b>Proportion of total population, %</b> | <b>Proportion of infected individuals hospitalised, %</b> | <b>Proportion of hospitalised cases requiring critical care, %</b> | <b>Proportion of individuals requiring critical care die, %</b> | <b>Infection fatality rate, %</b> |
|----------------------------------|----------|------------------------------------------|-----------------------------------------------------------|--------------------------------------------------------------------|-----------------------------------------------------------------|-----------------------------------|
| 0-9 years                        | 2450918  | 12.93                                    | 0.00                                                      | 0.00                                                               | 0.00                                                            | 0.00                              |
| 10-19 years                      | 2505672  | 13.22                                    | 0.04                                                      | 0.00                                                               | 0.00                                                            | 0.01                              |
| 20-29 years                      | 3020205  | 15.94                                    | 1.04                                                      | 5.00                                                               | 59.42                                                           | 0.03                              |
| 30-39 years                      | 2878807  | 15.19                                    | 3.43                                                      | 5.00                                                               | 49.21                                                           | 0.08                              |
| 40-49 years                      | 2556775  | 13.49                                    | 4.25                                                      | 6.30                                                               | 60.13                                                           | 0.16                              |
| 50-59 years                      | 2328585  | 12.29                                    | 8.16                                                      | 12.20                                                              | 59.77                                                           | 0.60                              |
| 60-69 years                      | 1737346  | 9.17                                     | 11.80                                                     | 27.40                                                              | 59.69                                                           | 1.93                              |
| 70-79 years                      | 950339   | 5.01                                     | 16.60                                                     | 43.20                                                              | 59.68                                                           | 4.28                              |
| 80+ years                        | 523388   | 2.76                                     | 18.40                                                     | 70.90                                                              | 59.79                                                           | 7.80                              |
| <b>Age-standardised rates, %</b> |          |                                          | <b>4.69</b>                                               | <b>25.78</b>                                                       | <b>59.51</b>                                                    | <b>0.72</b>                       |

**Table S4: Estimates of the severity of cases for the Netherlands**

| <b>Age group</b>                 | <b>N</b> | <b>Proportion of total population, %</b> | <b>Proportion of infected individuals hospitalised, %</b> | <b>Proportion of hospitalised cases requiring critical care, %</b> | <b>Proportion of individuals requiring critical care die, %</b> | <b>Infection fatality rate, %</b> |
|----------------------------------|----------|------------------------------------------|-----------------------------------------------------------|--------------------------------------------------------------------|-----------------------------------------------------------------|-----------------------------------|
| 0-9 years                        | 1762690  | 10.31                                    | 0.00                                                      | 0.00                                                               | 0.00                                                            | 0.00                              |
| 10-19 years                      | 1973468  | 11.54                                    | 0.04                                                      | 0.00                                                               | 0.00                                                            | 0.01                              |
| 20-29 years                      | 2106722  | 12.32                                    | 1.04                                                      | 5.00                                                               | 59.42                                                           | 0.03                              |
| 30-39 years                      | 2075858  | 12.14                                    | 3.43                                                      | 5.00                                                               | 49.21                                                           | 0.08                              |
| 40-49 years                      | 2201959  | 12.88                                    | 4.25                                                      | 6.30                                                               | 60.13                                                           | 0.16                              |
| 50-59 years                      | 2520370  | 14.74                                    | 8.16                                                      | 12.20                                                              | 59.77                                                           | 0.60                              |
| 60-69 years                      | 2109482  | 12.34                                    | 11.80                                                     | 27.40                                                              | 59.69                                                           | 1.93                              |
| 70-79 years                      | 1526904  | 8.93                                     | 16.60                                                     | 43.20                                                              | 59.68                                                           | 4.28                              |
| 80+ years                        | 819669   | 4.79                                     | 18.40                                                     | 70.90                                                              | 59.79                                                           | 7.80                              |
| <b>Age-standardised rates, %</b> |          |                                          | <b>6.12</b>                                               | <b>30.61</b>                                                       | <b>59.62</b>                                                    | <b>1.12</b>                       |

**Table S5: Estimates of the severity of cases for Colombia**

| Age group                        | N       | Proportion of total population, % | Proportion of infected individuals hospitalised, % | Proportion of hospitalised cases requiring critical care, % | Proportion of individuals requiring critical care die, % | Infection fatality rate, % |
|----------------------------------|---------|-----------------------------------|----------------------------------------------------|-------------------------------------------------------------|----------------------------------------------------------|----------------------------|
| 0-9 years                        | 7448799 | 14.80                             | 0.00                                               | 0.00                                                        | 0.00                                                     | 0.00                       |
| 10-19 years                      | 8231614 | 16.35                             | 0.04                                               | 0.00                                                        | 0.00                                                     | 0.01                       |
| 20-29 years                      | 8779218 | 17.44                             | 1.04                                               | 5.00                                                        | 59.42                                                    | 0.03                       |
| 30-39 years                      | 7667022 | 15.23                             | 3.43                                               | 5.00                                                        | 49.21                                                    | 0.08                       |
| 40-49 years                      | 6339173 | 12.59                             | 4.25                                               | 6.30                                                        | 60.13                                                    | 0.16                       |
| 50-59 years                      | 5445614 | 10.82                             | 8.16                                               | 12.20                                                       | 59.77                                                    | 0.60                       |
| 60-69 years                      | 3633308 | 7.22                              | 11.80                                              | 27.40                                                       | 59.69                                                    | 1.93                       |
| 70-79 years                      | 1882391 | 3.74                              | 16.60                                              | 43.20                                                       | 59.68                                                    | 4.28                       |
| 80+ years                        | 912304  | 1.81                              | 18.40                                              | 70.90                                                       | 59.79                                                    | 7.80                       |
| <b>Age-standardised rates, %</b> |         |                                   | <b>3.93</b>                                        | <b>23.25</b>                                                | <b>59.44</b>                                             | <b>0.54</b>                |

**Table S6: Estimates of the severity of cases for Mexico**

| <b>Age group</b>                 | <b>N</b> | <b>Proportion of total population, %</b> | <b>Proportion of infected individuals hospitalised, %</b> | <b>Proportion of hospitalised cases requiring critical care, %</b> | <b>Proportion of individuals requiring critical care die, %</b> | <b>Infection fatality rate, %</b> |
|----------------------------------|----------|------------------------------------------|-----------------------------------------------------------|--------------------------------------------------------------------|-----------------------------------------------------------------|-----------------------------------|
| 0-9 years                        | 22245383 | 17.44                                    | 0.00                                                      | 0.00                                                               | 0.00                                                            | 0.00                              |
| 10-19 years                      | 22356958 | 17.52                                    | 0.04                                                      | 0.00                                                               | 0.00                                                            | 0.01                              |
| 20-29 years                      | 21623928 | 16.95                                    | 1.04                                                      | 5.00                                                               | 59.42                                                           | 0.03                              |
| 30-39 years                      | 18636625 | 14.61                                    | 3.43                                                      | 5.00                                                               | 49.21                                                           | 0.08                              |
| 40-49 years                      | 16343173 | 12.81                                    | 4.25                                                      | 6.30                                                               | 60.13                                                           | 0.16                              |
| 50-59 years                      | 12397493 | 9.72                                     | 8.16                                                      | 12.20                                                              | 59.77                                                           | 0.60                              |
| 60-69 years                      | 7946332  | 6.23                                     | 11.80                                                     | 27.40                                                              | 59.69                                                           | 1.93                              |
| 70-79 years                      | 4023962  | 3.15                                     | 16.60                                                     | 43.20                                                              | 59.68                                                           | 4.28                              |
| 80+ years                        | 2001674  | 1.57                                     | 18.40                                                     | 70.90                                                              | 59.79                                                           | 7.80                              |
| <b>Age-standardised rates, %</b> |          |                                          | <b>3.57</b>                                               | <b>22.33</b>                                                       | <b>59.41</b>                                                    | <b>0.47</b>                       |

**Table S7: Estimates of the severity of cases for South Africa**

| Age group                        | N        | Proportion of total population, % | Proportion of infected individuals hospitalised, % | Proportion of hospitalised cases requiring critical care, % | Proportion of individuals requiring critical care die, % | Infection fatality rate, % |
|----------------------------------|----------|-----------------------------------|----------------------------------------------------|-------------------------------------------------------------|----------------------------------------------------------|----------------------------|
| 0-9 years                        | 11581615 | 19.78                             | 0.00                                               | 0.00                                                        | 0.00                                                     | 0.00                       |
| 10-19 years                      | 10240605 | 17.49                             | 0.04                                               | 0.00                                                        | 0.00                                                     | 0.01                       |
| 20-29 years                      | 10231760 | 17.47                             | 1.04                                               | 5.00                                                        | 59.42                                                    | 0.03                       |
| 30-39 years                      | 9942466  | 16.98                             | 3.43                                               | 5.00                                                        | 49.21                                                    | 0.08                       |
| 40-49 years                      | 6845747  | 11.69                             | 4.25                                               | 6.30                                                        | 60.13                                                    | 0.16                       |
| 50-59 years                      | 4794113  | 8.19                              | 8.16                                               | 12.20                                                       | 59.77                                                    | 0.60                       |
| 60-69 years                      | 3068429  | 5.24                              | 11.80                                              | 27.40                                                       | 59.69                                                    | 1.93                       |
| 70-79 years                      | 1430792  | 2.44                              | 16.60                                              | 43.20                                                       | 59.68                                                    | 4.28                       |
| 80+ years                        | 422740   | 0.72                              | 18.40                                              | 70.90                                                       | 59.79                                                    | 7.80                       |
| <b>Age-standardised rates, %</b> |          |                                   | <b>3.09</b>                                        | <b>19.07</b>                                                | <b>59.22</b>                                             | <b>0.35</b>                |

**Table S8: Estimates of the severity of cases for Sri Lanka**

| Age group                        | N       | Proportion of total population, % | Proportion of infected individuals hospitalised, % | Proportion of hospitalised cases requiring critical care, % | Proportion of individuals requiring critical care die, % | Infection fatality rate, % |
|----------------------------------|---------|-----------------------------------|----------------------------------------------------|-------------------------------------------------------------|----------------------------------------------------------|----------------------------|
| 0-9 years                        | 3383992 | 15.87                             | 0.00                                               | 0.00                                                        | 0.00                                                     | 0.00                       |
| 10-19 years                      | 3369304 | 15.80                             | 0.04                                               | 0.00                                                        | 0.00                                                     | 0.01                       |
| 20-29 years                      | 2906780 | 13.63                             | 1.04                                               | 5.00                                                        | 59.42                                                    | 0.03                       |
| 30-39 years                      | 2883558 | 13.52                             | 3.43                                               | 5.00                                                        | 49.21                                                    | 0.08                       |
| 40-49 years                      | 2848798 | 13.36                             | 4.25                                               | 6.30                                                        | 60.13                                                    | 0.16                       |
| 50-59 years                      | 2533919 | 11.88                             | 8.16                                               | 12.20                                                       | 59.77                                                    | 0.60                       |
| 60-69 years                      | 1966154 | 9.22                              | 11.80                                              | 27.40                                                       | 59.69                                                    | 1.93                       |
| 70-79 years                      | 1080639 | 5.07                              | 16.60                                              | 43.20                                                       | 59.68                                                    | 4.28                       |
| 80+ years                        | 350590  | 1.64                              | 18.40                                              | 70.90                                                       | 59.79                                                    | 7.80                       |
| <b>Age-standardised rates, %</b> |         |                                   | <b>4.38</b>                                        | <b>24.20</b>                                                | <b>59.50</b>                                             | <b>0.63</b>                |



**Table S9: Estimates of the severity of cases for Bangladesh**

| Age group                        | N        | Proportion of total population, % | Proportion of infected individuals hospitalised, % | Proportion of hospitalised cases requiring critical care, % | Proportion of individuals requiring critical care die, % | Infection fatality rate, % |
|----------------------------------|----------|-----------------------------------|----------------------------------------------------|-------------------------------------------------------------|----------------------------------------------------------|----------------------------|
| 0-9 years                        | 29140694 | 17.87                             | 0.00                                               | 0.00                                                        | 0.00                                                     | 0.00                       |
| 10-19 years                      | 30882112 | 18.94                             | 0.04                                               | 0.00                                                        | 0.00                                                     | 0.01                       |
| 20-29 years                      | 29600040 | 18.15                             | 1.04                                               | 5.00                                                        | 59.42                                                    | 0.03                       |
| 30-39 years                      | 26177061 | 16.05                             | 3.43                                               | 5.00                                                        | 49.21                                                    | 0.08                       |
| 40-49 years                      | 20143207 | 12.35                             | 4.25                                               | 6.30                                                        | 60.13                                                    | 0.16                       |
| 50-59 years                      | 14480320 | 8.88                              | 8.16                                               | 12.20                                                       | 59.77                                                    | 0.60                       |
| 60-69 years                      | 6892779  | 4.23                              | 11.80                                              | 27.40                                                       | 59.69                                                    | 1.93                       |
| 70-79 years                      | 4064814  | 2.49                              | 16.60                                              | 43.20                                                       | 59.68                                                    | 4.28                       |
| 80+ years                        | 1665146  | 1.02                              | 18.40                                              | 70.90                                                       | 59.79                                                    | 7.80                       |
| <b>Age-standardised rates, %</b> |          |                                   | <b>3.10</b>                                        | <b>19.60</b>                                                | <b>59.27</b>                                             | <b>0.36</b>                |

**Table S10: Estimates of the severity of cases for India**

| Age group                        | N         | Proportion of total population, % | Proportion of infected individuals hospitalised, % | Proportion of hospitalised cases requiring critical care, % | Proportion of individuals requiring critical care die, % | Infection fatality rate, % |
|----------------------------------|-----------|-----------------------------------|----------------------------------------------------|-------------------------------------------------------------|----------------------------------------------------------|----------------------------|
| 0-9 years                        | 236731829 | 17.32                             | 0.00                                               | 0.00                                                        | 0.00                                                     | 0.00                       |
| 10-19 years                      | 252674336 | 18.49                             | 0.04                                               | 0.00                                                        | 0.00                                                     | 0.01                       |
| 20-29 years                      | 238481457 | 17.45                             | 1.04                                               | 5.00                                                        | 59.42                                                    | 0.03                       |
| 30-39 years                      | 212399683 | 15.54                             | 3.43                                               | 5.00                                                        | 49.21                                                    | 0.08                       |
| 40-49 years                      | 165881490 | 12.14                             | 4.25                                               | 6.30                                                        | 60.13                                                    | 0.16                       |
| 50-59 years                      | 125378954 | 9.18                              | 8.16                                               | 12.20                                                       | 59.77                                                    | 0.60                       |
| 60-69 years                      | 84296275  | 6.17                              | 11.80                                              | 27.40                                                       | 59.69                                                    | 1.93                       |
| 70-79 years                      | 37500685  | 2.74                              | 16.60                                              | 43.20                                                       | 59.68                                                    | 4.28                       |
| 80+ years                        | 13073046  | 0.96                              | 18.40                                              | 70.90                                                       | 59.79                                                    | 7.80                       |
| <b>Age-standardised rates, %</b> |           |                                   | <b>3.35</b>                                        | <b>20.34</b>                                                | <b>59.32</b>                                             | <b>0.41</b>                |

**Table S11: Estimates of the severity of cases for Nigeria**

| Age group                        | N        | Proportion of total population, % | Proportion of infected individuals hospitalised, % | Proportion of hospitalised cases requiring critical care, % | Proportion of individuals requiring critical care die, % | Infection fatality rate, % |
|----------------------------------|----------|-----------------------------------|----------------------------------------------------|-------------------------------------------------------------|----------------------------------------------------------|----------------------------|
| 0-9 years                        | 62691322 | 31.20                             | 0.00                                               | 0.00                                                        | 0.00                                                     | 0.00                       |
| 10-19 years                      | 46319357 | 23.05                             | 0.04                                               | 0.00                                                        | 0.00                                                     | 0.01                       |
| 20-29 years                      | 32244205 | 16.04                             | 1.04                                               | 5.00                                                        | 59.42                                                    | 0.03                       |
| 30-39 years                      | 23840172 | 11.86                             | 3.43                                               | 5.00                                                        | 49.21                                                    | 0.08                       |
| 40-49 years                      | 16454206 | 8.19                              | 4.25                                               | 6.30                                                        | 60.13                                                    | 0.16                       |
| 50-59 years                      | 10366004 | 5.16                              | 8.16                                               | 12.20                                                       | 59.77                                                    | 0.60                       |
| 60-69 years                      | 6059156  | 3.02                              | 11.80                                              | 27.40                                                       | 59.69                                                    | 1.93                       |
| 70-79 years                      | 2555573  | 1.27                              | 16.60                                              | 43.20                                                       | 59.68                                                    | 4.28                       |
| 80+ years                        | 433608   | 0.22                              | 18.40                                              | 70.90                                                       | 59.79                                                    | 7.80                       |
| <b>Age-standardised rates, %</b> |          |                                   | <b>1.96</b>                                        | <b>16.28</b>                                                | <b>59.07</b>                                             | <b>0.19</b>                |

**Table S12: Estimates of the severity of cases for Pakistan**

| <b>Age group</b>                 | <b>N</b> | <b>Proportion of total population, %</b> | <b>Proportion of infected individuals hospitalised, %</b> | <b>Proportion of hospitalised cases requiring critical care, %</b> | <b>Proportion of individuals requiring critical care die, %</b> | <b>Infection fatality rate, %</b> |
|----------------------------------|----------|------------------------------------------|-----------------------------------------------------------|--------------------------------------------------------------------|-----------------------------------------------------------------|-----------------------------------|
| 0-9 years                        | 52774521 | 24.37                                    | 0.00                                                      | 0.00                                                               | 0.00                                                            | 0.00                              |
| 10-19 years                      | 44914765 | 20.74                                    | 0.04                                                      | 0.00                                                               | 0.00                                                            | 0.01                              |
| 20-29 years                      | 39377474 | 18.18                                    | 1.04                                                      | 5.00                                                               | 59.42                                                           | 0.03                              |
| 30-39 years                      | 29843795 | 13.78                                    | 3.43                                                      | 5.00                                                               | 49.21                                                           | 0.08                              |
| 40-49 years                      | 20586127 | 9.51                                     | 4.25                                                      | 6.30                                                               | 60.13                                                           | 0.16                              |
| 50-59 years                      | 14690100 | 6.78                                     | 8.16                                                      | 12.20                                                              | 59.77                                                           | 0.60                              |
| 60-69 years                      | 8500213  | 3.93                                     | 11.80                                                     | 27.40                                                              | 59.69                                                           | 1.93                              |
| 70-79 years                      | 4464790  | 2.06                                     | 16.60                                                     | 43.20                                                              | 59.68                                                           | 4.28                              |
| 80+ years                        | 1413532  | 0.65                                     | 18.40                                                     | 70.90                                                              | 59.79                                                           | 7.80                              |
| <b>Age-standardised rates, %</b> |          |                                          | <b>2.55</b>                                               | <b>19.03</b>                                                       | <b>59.23</b>                                                    | <b>0.29</b>                       |

**Table S13: Estimates of the severity of cases for Afghanistan**

| Age group                        | N        | Proportion of total population, % | Proportion of infected individuals hospitalised, % | Proportion of hospitalised cases requiring critical care, % | Proportion of individuals requiring critical care die, % | Infection fatality rate, % |
|----------------------------------|----------|-----------------------------------|----------------------------------------------------|-------------------------------------------------------------|----------------------------------------------------------|----------------------------|
| 0-9 years                        | 11040694 | 29.02                             | 0.00                                               | 0.00                                                        | 0.00                                                     | 0.00                       |
| 10-19 years                      | 9635671  | 25.33                             | 0.04                                               | 0.00                                                        | 0.00                                                     | 0.01                       |
| 20-29 years                      | 6779023  | 17.82                             | 1.04                                               | 5.00                                                        | 59.42                                                    | 0.03                       |
| 30-39 years                      | 4381488  | 11.52                             | 3.43                                               | 5.00                                                        | 49.21                                                    | 0.08                       |
| 40-49 years                      | 2846500  | 7.48                              | 4.25                                               | 6.30                                                        | 60.13                                                    | 0.16                       |
| 50-59 years                      | 1773768  | 4.66                              | 8.16                                               | 12.20                                                       | 59.77                                                    | 0.60                       |
| 60-69 years                      | 1020779  | 2.68                              | 11.80                                              | 27.40                                                       | 59.69                                                    | 1.93                       |
| 70-79 years                      | 458747   | 1.21                              | 16.60                                              | 43.20                                                       | 59.68                                                    | 4.28                       |
| 80+ years                        | 105087   | 0.28                              | 18.40                                              | 70.90                                                       | 59.79                                                    | 7.80                       |
| <b>Age-standardised rates, %</b> |          |                                   | <b>1.86</b>                                        | <b>16.41</b>                                                | <b>59.05</b>                                             | <b>0.18</b>                |

**Table S14: Estimates of the severity of cases for Burkina Faso**

| Age group                        | N       | Proportion of total population, % | Proportion of infected individuals hospitalised, % | Proportion of hospitalised cases requiring critical care, % | Proportion of individuals requiring critical care die, % | Infection fatality rate, % |
|----------------------------------|---------|-----------------------------------|----------------------------------------------------|-------------------------------------------------------------|----------------------------------------------------------|----------------------------|
| 0-9 years                        | 6431030 | 31.65                             | 0.00                                               | 0.00                                                        | 0.00                                                     | 0.00                       |
| 10-19 years                      | 4879742 | 24.01                             | 0.04                                               | 0.00                                                        | 0.00                                                     | 0.01                       |
| 20-29 years                      | 3397789 | 16.72                             | 1.04                                               | 5.00                                                        | 59.42                                                    | 0.03                       |
| 30-39 years                      | 2356070 | 11.59                             | 3.43                                               | 5.00                                                        | 49.21                                                    | 0.08                       |
| 40-49 years                      | 1524531 | 7.50                              | 4.25                                               | 6.30                                                        | 60.13                                                    | 0.16                       |
| 50-59 years                      | 939519  | 4.62                              | 8.16                                               | 12.20                                                       | 59.77                                                    | 0.60                       |
| 60-69 years                      | 516654  | 2.54                              | 11.80                                              | 27.40                                                       | 59.69                                                    | 1.93                       |
| 70-79 years                      | 227339  | 1.12                              | 16.60                                              | 43.20                                                       | 59.68                                                    | 4.28                       |
| 80+ years                        | 48708   | 0.24                              | 18.40                                              | 70.90                                                       | 59.79                                                    | 7.80                       |
| <b>Age-standardised rates, %</b> |         |                                   | <b>1.81</b>                                        | <b>15.96</b>                                                | <b>59.01</b>                                             | <b>0.17</b>                |

**Table S15: Estimates of the severity of cases for Tanzania**

| Age group                        | N        | Proportion of total population, % | Proportion of infected individuals hospitalised, % | Proportion of hospitalised cases requiring critical care, % | Proportion of individuals requiring critical care die, % | Infection fatality rate, % |
|----------------------------------|----------|-----------------------------------|----------------------------------------------------|-------------------------------------------------------------|----------------------------------------------------------|----------------------------|
| 0-9 years                        | 17990384 | 31.01                             | 0.00                                               | 0.00                                                        | 0.00                                                     | 0.00                       |
| 10-19 years                      | 13636144 | 23.51                             | 0.04                                               | 0.00                                                        | 0.00                                                     | 0.01                       |
| 20-29 years                      | 9575102  | 16.51                             | 1.04                                               | 5.00                                                        | 59.42                                                    | 0.03                       |
| 30-39 years                      | 6938129  | 11.96                             | 3.43                                               | 5.00                                                        | 49.21                                                    | 0.08                       |
| 40-49 years                      | 4635689  | 7.99                              | 4.25                                               | 6.30                                                        | 60.13                                                    | 0.16                       |
| 50-59 years                      | 2803032  | 4.83                              | 8.16                                               | 12.20                                                       | 59.77                                                    | 0.60                       |
| 60-69 years                      | 1556334  | 2.68                              | 11.80                                              | 27.40                                                       | 59.69                                                    | 1.93                       |
| 70-79 years                      | 710015   | 1.22                              | 16.60                                              | 43.20                                                       | 59.68                                                    | 4.28                       |
| 80+ years                        | 160632   | 0.28                              | 18.40                                              | 70.90                                                       | 59.79                                                    | 7.80                       |
| <b>Age-standardised rates, %</b> |          |                                   | <b>1.90</b>                                        | <b>16.31</b>                                                | <b>59.04</b>                                             | <b>0.18</b>                |

**Table S16: Estimates of the severity of cases for Uganda**

| Age group                        | N        | Proportion of total population, % | Proportion of infected individuals hospitalised, % | Proportion of hospitalised cases requiring critical care, % | Proportion of individuals requiring critical care die, % | Infection fatality rate, % |
|----------------------------------|----------|-----------------------------------|----------------------------------------------------|-------------------------------------------------------------|----------------------------------------------------------|----------------------------|
| 0-9 years                        | 14582039 | 32.94                             | 0.00                                               | 0.00                                                        | 0.00                                                     | 0.00                       |
| 10-19 years                      | 11067913 | 25.00                             | 0.04                                               | 0.00                                                        | 0.00                                                     | 0.01                       |
| 20-29 years                      | 7564888  | 17.09                             | 1.04                                               | 5.00                                                        | 59.42                                                    | 0.03                       |
| 30-39 years                      | 4881270  | 11.03                             | 3.43                                               | 5.00                                                        | 49.21                                                    | 0.08                       |
| 40-49 years                      | 2997016  | 6.77                              | 4.25                                               | 6.30                                                        | 60.13                                                    | 0.16                       |
| 50-59 years                      | 1765499  | 3.99                              | 8.16                                               | 12.20                                                       | 59.77                                                    | 0.60                       |
| 60-69 years                      | 930221   | 2.10                              | 11.80                                              | 27.40                                                       | 59.69                                                    | 1.93                       |
| 70-79 years                      | 391414   | 0.88                              | 16.60                                              | 43.20                                                       | 59.68                                                    | 4.28                       |
| 80+ years                        | 89327    | 0.20                              | 18.40                                              | 70.90                                                       | 59.79                                                    | 7.80                       |
| <b>Age-standardised rates, %</b> |          |                                   | <b>1.61</b>                                        | <b>15.10</b>                                                | <b>58.92</b>                                             | <b>0.15</b>                |
